# Supplementary material
Source: publisher figshare collection journal article supplement (https://acs.figshare.com/ndownloader/files/4118497)
Supplement: Supplementary file 1 [file 4118497]

## Supporting information

# High Temperature Luminescence Quenching of Colloidal Quantum Dots

*Yiming Zhao,<sup>1</sup> Charl Riemersma,<sup>1</sup> Francesca Pietra,<sup>1</sup> Rolf Koole,<sup>2</sup> Celso de Mello Donegá<sup>1</sup> and  
Andries Meijerink<sup>1\*</sup>*

1. Condensed Matter and Interfaces, Debye Institute for Nanomaterials Science, Utrecht University, Princetonplein 5, 3584 CC Utrecht, The Netherlands.

2. Philips Research Laboratories, High Tech Campus 4, 5656 AE Eindhoven, The Netherlands.

\*Corresponding author:

A.Meijerink@uu.nl

**Table S1.** Characteristics of the colloidal nanocrystals used in the experiments. The core sizes have been determined from the position of the first absorption peak and known sizing curves [1]. Total particle sizes are based on analysis of TEM images of multiple NCs. The PL wavelength and quantum yield are measured by using the set-up described in the main text.

| Sample name       | Core diameter<br>(nm) | Particle size <sup>a</sup><br>(nm) | PL wavelength<br>(nm) | Quantum Yield<br>(%) |
|-------------------|-----------------------|------------------------------------|-----------------------|----------------------|
| CdSe QDs          | 3.4                   | 3.4                                | 573                   | 28                   |
| CdSe/CdS/ZnS QDs  | 3.4                   | 7.0                                | 610                   | 64                   |
| CdSe/CdS nanorods | 3.2                   | 5.5/21.1                           | 604                   | 72                   |
| CdTe/CdSe QDs     | 3.0                   | 6.1                                | 614                   | 59                   |

a. For spherical QDs, the particle sizes are given as average diameter. For nanorods, the average diameter and length are given.

## Supporting Figures

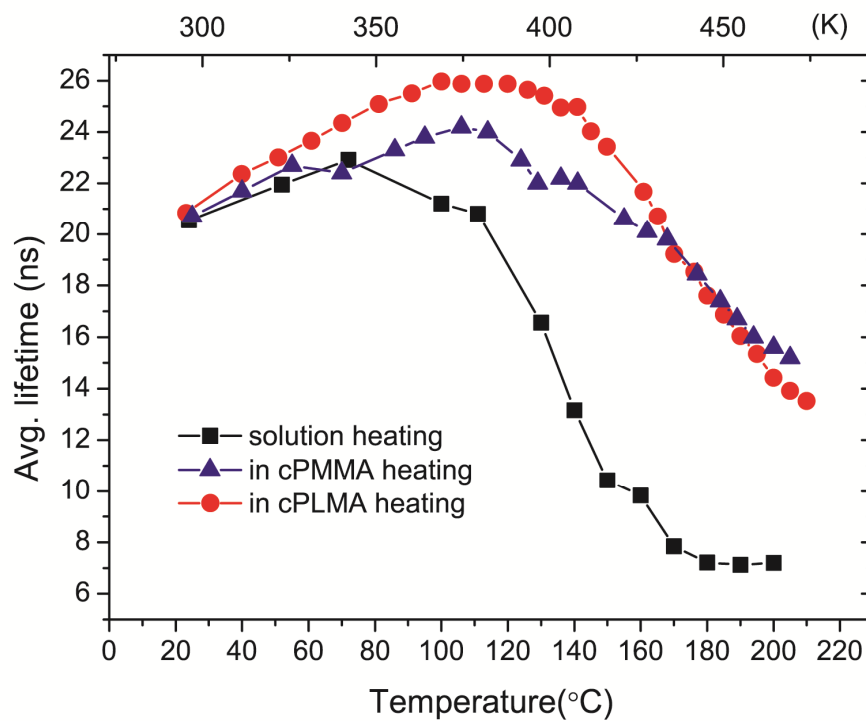

**Figure S1.** Temperature dependent average exciton lifetime for CdSe/CdS/ZnS core-shell-shell QDs in 1-Octadecene (ODE) solution (black squares), crosslinked PMMA (blue triangles) and crosslinked PLMA (red circles).

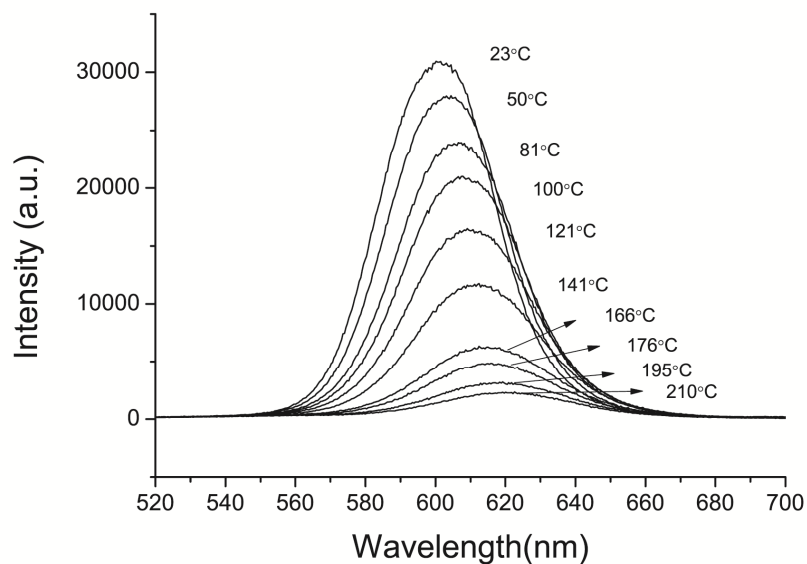

**Figure S2.** Temperature dependent PL spectra of CdSe/CdS/ZnS core-shell-shell QDs in PLMA at the temperatures indicated.

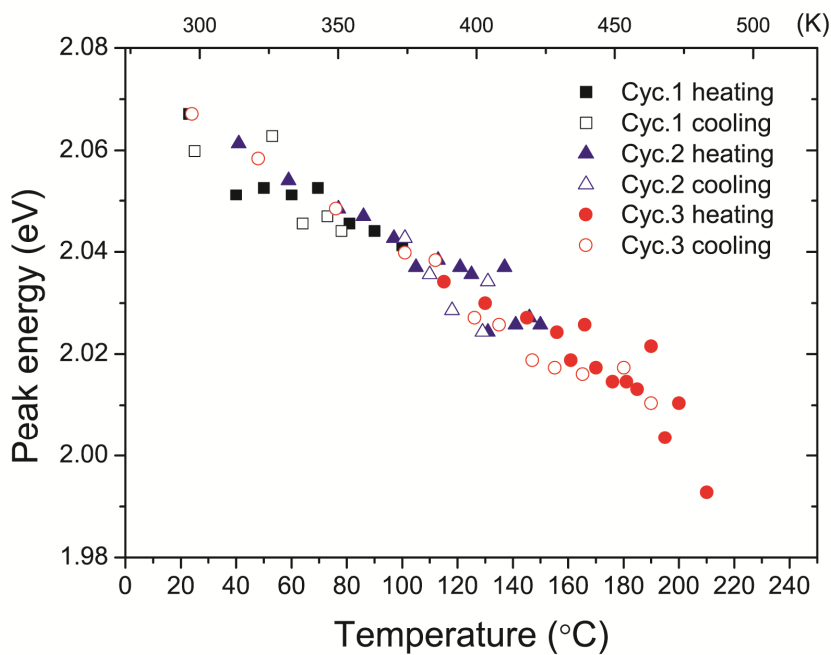

**Figure S3.** PL peak energy of CdSe/CdS/ZnS core-shell-shell QDs in PLMA during heating cycles.

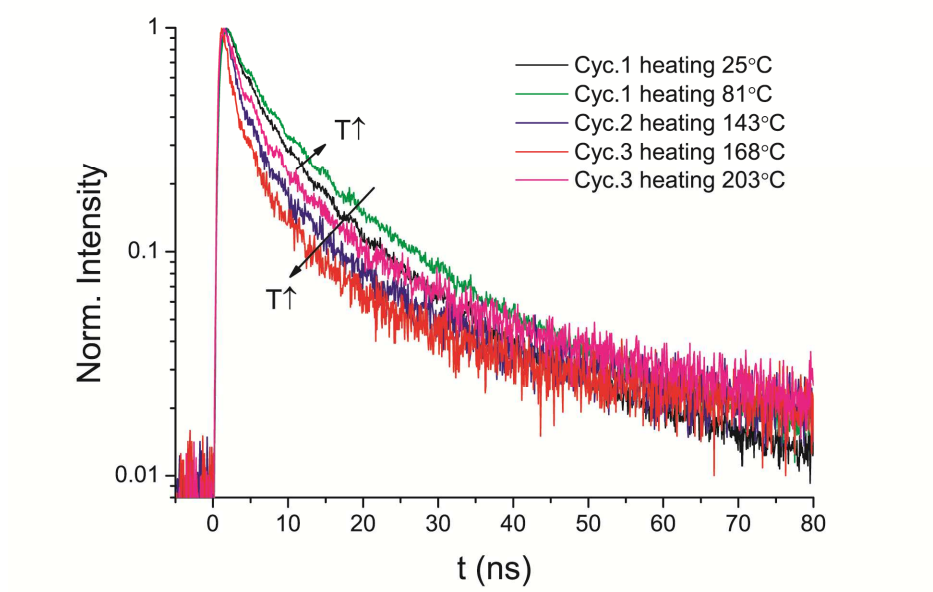

**Figure S4.** PL luminescence decay curves of CdSe/CdS dot core/rod shell nanorods at selected temperatures.

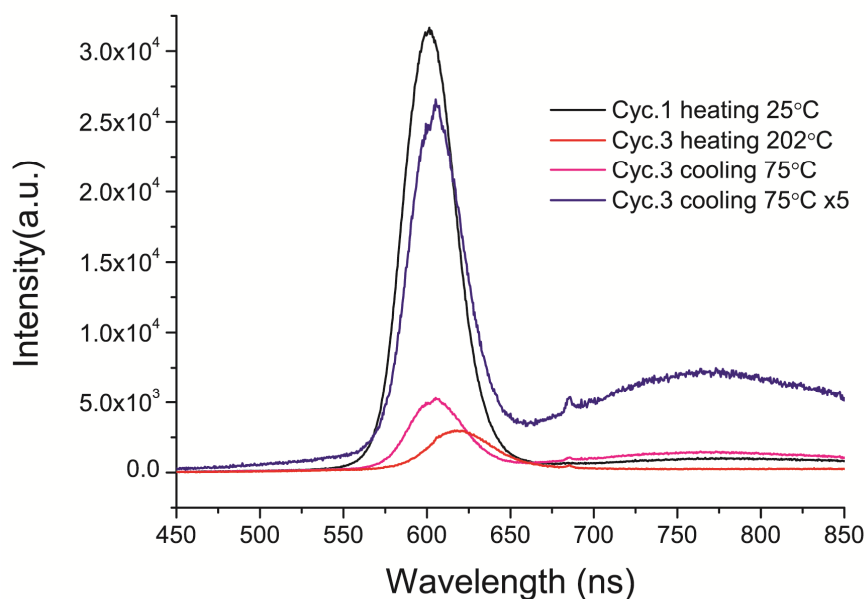

**Figure S5.** PL spectra of CdSe/CdS dot core/rod shell nanorods at the temperatures indicated. The black curve was measured prior to heating. The red curve was obtained at 202 °C in the third heating cycle. The magenta curve was measured at 75 °C upon cooling down from 202°C, after the third heating cycle. The blue curve corresponds to the magenta curve multiplied by 5. The broad defect related emission at around 770 nm can be clearly observed.

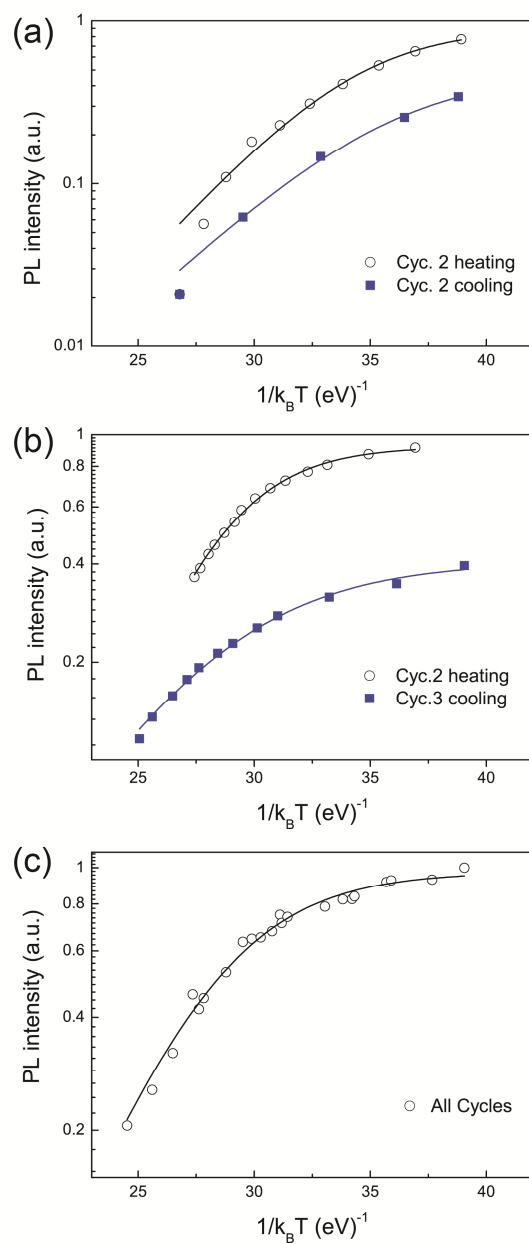

**Figure S6.** Integrated PL intensities of QDs with different structures are plotted as a function of  $1/k_B T$ . The solid lines are fitted curves for an Arrhenius dependence. (a) organically capped CdSe, (b) CdSe/CdS/ZnS QDs and (c) CdTe/CdSe QD.

**Table S2.** Activation energies extracted by fitting the temperature dependence of the integrated emission intensity to an Arrhenius dependence.

| Sample name                    | $E_a$ (eV) | Standard errors |
|--------------------------------|------------|-----------------|
| CdSe QDs Cyc.2 heating         | 0.36       | 0.03            |
| CdSe QDs Cyc.2 cooling         | 0.30       | 0.04            |
| CdSe/CdS/ZnS QDs Cyc.2 heating | 0.44       | 0.01            |
| CdSe/CdS/ZnS QDs Cyc.3 cooling | 0.26       | 0.02            |
| CdTe/CdSe QDs                  | 0.34       | 0.02            |

The thermal quenching of intensity is fitted to an Arrhenius behavior with a single activation energy,  $E_a$  which can be extracted by fitting the experimental data to the expression:

$$I \propto 1 / [1 + B \exp(-E_a / k_B T)] \quad (1)$$

where B is a constant, and  $k_B$  is the Boltzmann constant [Ref. 9, 10,12].

The fitted curves for organically capped CdSe, CdSe/CdS/ZnS QDs and CdTe/CdSe QDs are given in Figure S6. The activation energy  $E_a$  extracted from different heating cycles are presented in Table S2. For the same dots,  $E_a$  changes after heating cycles due to the irreversible quenching. For CdSe/CdS nanorods determination of  $E_a$  is hampered by the strong irreversible quenching.

## References

1. Donega, C. D.; Koole, R. *J Phys Chem C* **2009**, 113, (16), 6511-6520.
